# Supplementary material for: A systematic review of physical activity in people with haemophilia and its relationship with bleeding phenotype and treatment regimen
Source: PubMed Central journal article supplement — Haemophilia. 2021 Mar 10;27(4):544–62. doi: 10.1111/hae.14282 (PMC8359343; doi:10.1111/hae.14282), 2021-03-10
Supplement: HAE-27-544-s001.pdf [file HAE-27-544-s001.pdf]

## **APPENDIX**

### **Search Strategy**

#### **Medline (OVID)**

1. exp Exercise/ OR exp Exercise Therapy/ OR exp Physical Fitness/ OR exp "physical education and training"/ OR exp "Exercise Movement Techniques"/ or physical endurance/ or exercise tolerance/ OR Physical Exertion/ or exp Sports/ or Dancing/
2. (strength\$ or isometric\$ or isotonic\$ or isokinetic\$).ti,ab.
3. (resistance adj3 train\$).ti,ab.
4. ((physical\$ or motion\$) adj3 (fit\$ or therap\$)).ti,ab.
5. (treadmill\$ or cross-train\$ or rowing or sport\$ OR exercis\$ OR "physical activit\$" OR aerobic\$ OR run or jog\$ or running OR walk or walks or walking OR gym\$ OR yoga oR pilates OR "recreation\$ activit\$" OR zumba or salsa\$ OR cycling or bicycle or bike or swim\$ or dance or dancer\$ or dances or dancing).ti,ab.
6. (circuit\$ adj1 train\$).ti,ab.
7. (keep\$ adj1 (active or fit)).ti,ab.
8. or/1-7
9. exp Hemorrhage/ OR Hemarthrosis/
10. ((joint\$ or spontaneous or Intraarticular or Intra-articular OR articular OR knee\$ OR elbow\$ OR ankle\$) adj3 (bleed\$ OR H?emorrhag\$ OR h?emarthosis)).ti,ab.
11. H?emorrhag\$.ti,ab.
12. or/9-11
13. Hemophilia A/ or Hemophilia B/
14. (H?emophili\$).ti,ab.
15. or/13-14
16. 8 and 12 and 15

#### **EMBASE**

1. 'exercise'/exp OR 'kinesiotherapy'/exp OR 'physical activity'/exp OR 'physical activity, capacity and performance'/de OR 'training'/de OR 'endurance'/de OR 'exercise tolerance'/de OR 'physical capacity'/de OR 'sport'/exp
1. (strength\* or isometric\* or isotonic\* or isokinetic\*):ti,ab
2. (resistance NEAR/3 train\*):ti,ab
3. ((physical\* or motion\*) NEAR/3 (fit\* or therap\*)):ti,ab
4. (treadmill\* or cross-train\* or rowing or sport\* OR exercise\* OR "physical activit\*" OR aerobic\* OR run or jog\* or running OR walk or walks or walking OR gym\* OR yoga oR

- pilates OR "recreation\* activit\*" OR zumba or salsa\* OR cycling or bicycle or bike or swim\* or dance or dancer\* or dances or dancing):ti,ab
5. (circuit\* NEAR/1 train\*):ti,ab
  6. (keep\* NEAR/1 (active or fit)):ti,ab
  7. #1 OR #2 OR #3 OR #4 OR #5 OR #6 OR #7
  8. 'bleeding'/de OR 'hemarthrosis'/exp
  9. ((joint\* or spontaneous or Intraarticular or Intra-articular OR articular knee\* OR elbow\* OR ankle\*) NEAR/3 (bleed\* OR Hemorrhag\* OR haemorrhag\*)):ti,ab
  10. (Hemorrhag\* OR haemorrhag\* OR hemarthosis OR haemarthosis):ti,ab
  11. #9 OR #10 OR #11
  12. 'hemophilia'/exp
  13. (Hemophili\* OR Haemophili\*):ti,ab
  14. #13 OR #14
  15. #8 AND #12 AND #15

## **Cochrane**

1. [mh "Exercise"] OR [mh "Exercise Therapy"] OR [mh "Physical Fitness"] OR [mh "physical education and training"] OR [mh "Exercise Movement Techniques"] OR [mh "physical endurance"] OR [mh ^"exercise tolerance"] OR [mh ^"Physical Exertion"] OR [mh "Sports"] OR [mh ^"Dancing"]
2. (strength\* or isometric\* or isotonic\* or isokinetic\*):ti,ab,kw
3. (resistance NEAR/3 train\*):ti,ab,kw
4. ((physical\* or motion\*) NEAR/3 (fit\* or therap\*)):ti,ab,kw
5. (treadmill\* or cross-train\* or rowing or sport\* OR exercise\* OR "physical activit\*" OR aerobic\* OR run or jog\* or running OR walk or walks or walking OR gym\* OR yoga or pilates OR "recreation\* activit\*" OR zumba or salsa\* OR cycling or bicycle or bike or swim\* or dance or dancer\* or dances or dancing):ti,ab,kw
6. (circuit\* NEAR/1 train\*):ti,ab,kw
7. (keep\* NEAR/1 (active or fit)):ti,ab,kw
8. {OR #1-#7}
9. [mh "Hemorrhage"] OR [mh "hemarthrosis"]
10. (Hemorrhag\* OR haemorrhag\* OR hemarthosis OR haemarthosis):ti,ab,kw
11. ((joint\* or spontaneous or Intraarticular or Intra-articular OR articular knee\* OR elbow\* OR ankle\*) NEAR/3 (bleed\* OR Hemorrhag\* OR haemorrhag\*)):ti,ab,kw
12. {OR #9-#11}
13. [mh "Hemophilia A"] OR [mh "Hemophilia B"]
14. (Hemophili\* OR Haemophili\*):ti,ab,kw

15. #13 OR #14

16. #8 AND #12 AND #15

## CINAHL

1. (MH "Exercise+") OR (MH "Therapeutic Exercise+") OR (MH "Physical Fitness+") OR (MH "Physical Endurance+") OR (MH "Exertion") OR (MH "Exercise Intensity") OR (MH "Sports+") OR (MH "Dancing+")
1. TI (strength\* or isometric\* or isotonic\* or isokinetic\*) OR AB (strength\* or isometric\* or isotonic\* or isokinetic\*)
2. TI (resistance N3 train\*) OR AB (resistance N3 train\*)
3. TI ((physical\* or motion\*) N3 (fit\* or therap\*)) OR AB ((physical\* or motion\*) N3 (fit\* or therap\*))
4. TI(treadmill\* or cross-train\* or rowing or sport\* OR exercise\* OR "physical activit\*" OR aerobic\* OR run or jog\* or running OR walk or walks or walking OR gym\* OR yoga oR pilates OR "recreation\* activit\*" OR zumba or salsa\* OR cycling or bicycle or bike or swim\* or dance or dancer\* or dances or dancing) OR AB (treadmill\* or cross-train\* or rowing or sport\* OR exercise\* OR "physical activit\*" OR aerobic\* OR run or jog\* or running OR walk or walks or walking OR gym\* OR yoga oR pilates OR "recreation\* activit\*" OR zumba or salsa\* OR cycling or bicycle or bike or swim\* or dance or dancer\* or dances or dancing)
5. TI (circuit\* N1 train\*) OR AB (circuit\* N1 train\*)
6. TI (keep\* N1 (active or fit)) OR AB (keep\* N1 (active or fit))
7. S1 OR S2 OR S3 OR S4 OR S5 OR S6 OR S7
8. (MH "Hemorrhage") OR (MH "Hemarthrosis")
9. TI((joint\* or spontaneous or Intraarticular or Intra-articular OR articular knee\* OR elbow\* OR ankle\*) N3 (bleed\* OR H?emorrhag\*)) OR AB ((joint\* or spontaneous or Intraarticular or Intra-articular OR articular knee\* OR elbow\* OR ankle\*) N3 (bleed\* OR H?emorrhag\*))
10. TI(Hemorrhag\* OR haemorrhag\* OR hemarthosis OR haemarthosis) OR AB(Hemorrhag\* OR haemorrhag\* OR hemarthosis OR haemarthosis)
11. S9 or S10 OR S11
12. (MH "Hemophilia")
13. TI (Hemophili\* OR Haemophili\*) OR AB (Hemophili\* OR Haemophili\*)
14. S13 OR S14
15. S8 AND S12 AND S15

## Web of Science

1. TS=((strength\* or isometric\* or isotonic\* or isokinetic\*) OR (resistance NEAR/3 train\*) OR ((physical\* or motion\*) NEAR/3 (fit\* or therap\*)) OR (treadmill\* or cross-train\* or rowing or

sport\* OR exercise\* OR "physical activit\*" OR aerobic\* OR run or jog\* or running OR walk or walks or walking OR gym\* OR yoga oR pilates OR "recreation\* activit\*" OR zumba or salsa\* OR cycling or bicycle or bike or swim\* or dance or dancer\* or dances or dancing) OR (circuit\* NEAR/1 train\*) OR (keep\* NEAR/1 (active or fit)) )

2. TS=(Hemorrhag\* OR haemorrhag\* OR hemarthosis OR haemarthosis)
3. TS=(((Joint OR spontaneous OR knee\* OR elbow\* OR ankle\* OR Intraarticular) NEAR/3 (bleed\* OR Hemorrhag\* OR haemorrhag\*)))
4. #2 OR #3
5. TS=((Hemophili\* OR Haemophili\*))
6. #1 AND #4 AND #5
