# Supplementary material for: A systematic review of physical activity in people with haemophilia and its relationship with bleeding phenotype and treatment regimen
Source: PubMed Central journal article supplement — Haemophilia. 2021 Mar 10;27(4):544–62. doi: 10.1111/hae.14282 (PMC8359343; doi:10.1111/hae.14282), 2021-03-10
Supplement: HAE-27-544-s002.pdf [file HAE-27-544-s002.pdf]

**Supplementary Table: STROBE analysis**

|                       |     | Janco et al. (1996) [28] | Heijnen et al. (2000) [21] | Van der Net et al. (2006) [29] | Nazzaro et al. (2006) [30] | Fromme et al. (2007) [31] | Tlacuilo-Parra et al. (2008) [22] | Tikfinsky et al. (2009) [32] | Koiter et al. (2009) [23] | Ross et al. (2009) [33] | Sherlock et al. (2010) [34] | Khawaji et al. (2010) [35] | Buxbaum et al. (2010) [36] | Groen et al. (2011) [24] | Gonzalez et al. (2011) [37] | Khair et al. (2012) [38] | Broderick et al. (2012) [39] | Baumgardner et al. (2013) [40] | den Uijl et al. (2013) [41] | Broderick et al. (2013) [25] | Niu et al. (2014) [26] | McGee et al. (2015) [42] | Von Mackensen et al. (2016) [27] | Cuesta-Barruso et al. (2016) [43] | Bouskill et al. (2016) [44] | Carneiro et al. (2017) [45] | Baumann et al. (2017) [14] | Flaherty et al. (2018) [15] | Kempton et al. (2018) [46] | Pinto et al. (2018) [47] | Pinto et al. (2018) [48] | Versboot et al. (2019) [49] | Goto et al. (2019) [50] | Zanon et al. (2020) [51] | Timmer et al. (2020) [52] | Taylor et al. (2020) [53] | Bérbé et al. (2020) [54] |   |   |   |   |
|-----------------------|-----|--------------------------|----------------------------|--------------------------------|----------------------------|---------------------------|-----------------------------------|------------------------------|---------------------------|-------------------------|-----------------------------|----------------------------|----------------------------|--------------------------|-----------------------------|--------------------------|------------------------------|--------------------------------|-----------------------------|------------------------------|------------------------|--------------------------|----------------------------------|-----------------------------------|-----------------------------|-----------------------------|----------------------------|-----------------------------|----------------------------|--------------------------|--------------------------|-----------------------------|-------------------------|--------------------------|---------------------------|---------------------------|--------------------------|---|---|---|---|
| <b>Title/abstract</b> | 1a  | Y                        | N                          | Y                              | Y                          | N                         | Y                                 | N                            | N                         | N                       | N                           | N                          | N                          | N                        | Y                           | Y                        | Y                            | Y                              | Y                           | Y                            | N                      | Y                        | Y                                | Y                                 | Y                           | Y                           | Y                          | Y                           | N                          | N                        | Y                        | N                           | N                       | N                        | N                         | N                         | N                        | Y | N |   |   |
|                       | 1b  | N                        | N                          | N                              | Y                          | Y                         | Y                                 | Y                            | N                         | N                       | N                           | Y                          | N                          | N                        | N                           | Y                        | Y                            | N                              | N                           | Y                            | Y                      | Y                        | Y                                | N                                 | N                           | N                           | N                          | N                           | Y                          | Y                        | Y                        | Y                           | Y                       | Y                        | Y                         | Y                         | N                        | Y | Y | N |   |
| <b>Introduction</b>   |     |                          |                            |                                |                            |                           |                                   |                              |                           |                         |                             |                            |                            |                          |                             |                          |                              |                                |                             |                              |                        |                          |                                  |                                   |                             |                             |                            |                             |                            |                          |                          |                             |                         |                          |                           |                           |                          |   |   |   |   |
| Background            | 2   | Y                        | Y                          | Y                              | Y                          | Y                         | Y                                 | Y                            | Y                         | Y                       | Y                           | Y                          | Y                          | Y                        | Y                           | Y                        | Y                            | Y                              | Y                           | Y                            | Y                      | Y                        | Y                                | Y                                 | Y                           | Y                           | Y                          | Y                           | Y                          | Y                        | Y                        | Y                           | Y                       | Y                        | Y                         | Y                         | Y                        | Y | Y | Y |   |
| Objectives            | 3   | N                        | Y                          | Y                              | Y                          | N                         | Y                                 | Y                            | Y                         | Y                       | Y                           | Y                          | Y                          | Y                        | N                           | Y                        | Y                            | Y                              | Y                           | Y                            | Y                      | Y                        | N                                | Y                                 | Y                           | Y                           | Y                          | Y                           | Y                          | Y                        | N                        | Y                           | N                       | Y                        | Y                         | Y                         | Y                        | Y | Y | Y |   |
| <b>Methods</b>        |     |                          |                            |                                |                            |                           |                                   |                              |                           |                         |                             |                            |                            |                          |                             |                          |                              |                                |                             |                              |                        |                          |                                  |                                   |                             |                             |                            |                             |                            |                          |                          |                             |                         |                          |                           |                           |                          |   |   |   |   |
| Study design          | 4   | N                        | N                          | N                              | N                          | N                         | N                                 | Y                            | N                         | N                       | N                           | N                          | N                          | N                        | Y                           | N                        | Y                            | N                              | N                           | N                            | Y                      | Y                        | N                                | Y                                 | N                           | N                           | N                          | N                           | N                          | Y                        | Y                        | Y                           | N                       | N                        | Y                         | Y                         | N                        | Y | Y | N | N |
| Setting               | 5   | N                        | N                          | Y                              | N                          | N                         | N                                 | N                            | N                         | N                       | N                           | N                          | Y                          | N                        | N                           | N                        | Y                            | N                              | N                           | N                            | N                      | Y                        | N                                | Y                                 | N                           | N                           | N                          | N                           | N                          | Y                        | Y                        | Y                           | N                       | N                        | N                         | N                         | N                        | N | Y | N | N |
| Participants          | 6a  | N                        | N                          | N                              | N                          | N                         | N                                 | Y                            | N                         | Y                       | N                           | N                          | N                          | N                        | N                           | N                        | N                            | N                              | N                           | N                            | N                      | N                        | N                                | N                                 | N                           | Y                           | N                          | N                           | N                          | Y                        | Y                        | N                           | N                       | N                        | N                         | N                         | N                        | N | N | Y | N |
| Variables             | 7   | N                        | N                          | N                              | N                          | N                         | N                                 | N                            | N                         | Y                       | N                           | N                          | N                          | N                        | Y                           | N                        | Y                            | Y                              | N                           | N                            | Y                      | N                        | N                                | N                                 | N                           | N                           | N                          | N                           | N                          | N                        | N                        | Y                           | N                       | N                        | N                         | N                         | N                        | N | N | N | N |
| Data sources          | 8   | N                        | N                          | N                              | N                          | N                         | N                                 | Y                            | Y                         | Y                       | N                           | Y                          | N                          | N                        | N                           | N                        | N                            | N                              | N                           | N                            | N                      | Y                        | N                                | N                                 | N                           | N                           | N                          | N                           | N                          | N                        | N                        | N                           | N                       | N                        | N                         | N                         | N                        | N | N | N | N |
| Bias                  | 9   | N                        | N                          | N                              | Y                          | N                         | N                                 | N                            | N                         | N                       | Y                           | N                          | N                          | N                        | N                           | N                        | Y                            | N                              | N                           | N                            | N                      | N                        | N                                | N                                 | Y                           | Y                           | N                          | N                           | N                          | N                        | N                        | Y                           | Y                       | N                        | N                         | N                         | N                        | N | N | N | N |
| Study size            | 10  | N                        | N                          | N                              | N                          | N                         | N                                 | N                            | N                         | N                       | N                           | N                          | N                          | N                        | N                           | N                        | Y                            | N                              | N                           | N                            | N                      | N                        | N                                | N                                 | Y                           | Y                           | N                          | N                           | N                          | N                        | N                        | Y                           | N                       | N                        | N                         | N                         | N                        | N | N | N | N |
| Quantitative          | 11  | N                        | N                          | N                              | N                          | N                         | N                                 | Y                            | Y                         | Y                       | N                           | Y                          | Y                          | Y                        | Y                           | N                        | Y                            | Y                              | N                           | N                            | Y                      | N                        | N                                | Y                                 | Y                           | Y                           | Y                          | N                           | N                          | Y                        | Y                        | Y                           | Y                       | Y                        | Y                         | Y                         | Y                        | Y | Y | Y |   |
| Statistics            | 12a | N                        | N                          | N                              | N                          | N                         | N                                 | N                            | N                         | N                       | N                           | N                          | N                          | N                        | Y                           | Y                        | Y                            | N                              | N                           | N                            | N                      | N                        | Y                                | N                                 | N                           | N                           | N                          | N                           | N                          | Y                        | N                        | N                           | N                       | N                        | Y                         | N                         | N                        | N | N | N | N |
|                       | 12b | N                        | N                          | N                              | N                          | N                         | N                                 | Y                            | Y                         | Y                       | N                           | Y                          | Y                          | Y                        | Y                           | N                        | Y                            | Y                              | N                           | N                            | Y                      | Y                        | N                                | Y                                 | Y                           | Y                           | *                          | N                           | N                          | N                        | Y                        | Y                           | Y                       | Y                        | Y                         | Y                         | Y                        | Y | Y | Y | Y |
|                       | 12c | N                        | N                          | N                              | N                          | N                         | N                                 | N                            | N                         | N                       | N                           | N                          | N                          | N                        | N                           | N                        | Y                            | N                              | N                           | N                            | N                      | N                        | N                                | N                                 | N                           | N                           | *                          | N                           | N                          | N                        | Y                        | N                           | N                       | N                        | Y                         | N                         | N                        | N | N | Y | N |
|                       | 12d | N                        | N                          | N                              | N                          | N                         | N                                 | N                            | N                         | N                       | N                           | N                          | N                          | N                        | Y                           | N                        | Y                            | N                              | N                           | N                            | N                      | N                        | N                                | N                                 | N                           | Y                           | *                          | N                           | N                          | N                        | Y                        | N                           | N                       | N                        | N                         | N                         | N                        | N | N | N | Y |

\*N'= No; \*Y'= Yes; \*= Not applicable.

**Supplementary Table: STROBE analysis (continued)**

|                    |                            | Janco et al. (1996) [28] | Heijnen et al. (2000) [21] | Van der Net et al. (2006) [29] | Nazzaro et al. (2006) [30] | Fromme et al. (2007) [31] | Tlacuilo-Parra et al. (2008) [22] | Tikfinsky et al. (2009) [32] | Koiter et al. (2009) [23] | Ross et al. (2009) [33] | Sherlock et al. (2010) [34] | Khawaji et al. (2010) [35] | Buxbaum et al. (2010) [36] | Groen et al. (2011) [24] | Gonzalez et al. (2011) [37] | Khair et al. (2012) [38] | Broderick et al. (2012) [39] | Baumgardner et al. (2013) [40] | den Uijl et al. (2013) [41] | Broderick et al. (2013) [25] | Niu et al. (2014) [26] | McGee et al. (2015) [42] | Von Mackensen et al. (2016) [27] | Cuesta-Barruso et al. (2016) [43] | Bouskill et al. (2016) [44] | Carneiro et al. (2017) [45] | Baumann et al. (2017) [14] | Flaherty et al. (2018) [15] | Kempton et al. (2018) [46] | Pinto et al. (2018) [47] | Pinto et al. (2018) [48] | Verschoor et al. (2019) [49] | Goto et al. (2019) [50] | Zanon et al. (2020) [51] | Timmer et al. (2020) [52] | Taylor et al. (2020) [53] | Béribé et al. (2020) [54] |   |   |   |   |   |  |  |  |  |  |  |  |  |  |  |  |  |  |  |  |  |  |  |
|--------------------|----------------------------|--------------------------|----------------------------|--------------------------------|----------------------------|---------------------------|-----------------------------------|------------------------------|---------------------------|-------------------------|-----------------------------|----------------------------|----------------------------|--------------------------|-----------------------------|--------------------------|------------------------------|--------------------------------|-----------------------------|------------------------------|------------------------|--------------------------|----------------------------------|-----------------------------------|-----------------------------|-----------------------------|----------------------------|-----------------------------|----------------------------|--------------------------|--------------------------|------------------------------|-------------------------|--------------------------|---------------------------|---------------------------|---------------------------|---|---|---|---|---|--|--|--|--|--|--|--|--|--|--|--|--|--|--|--|--|--|--|
| <b>Results</b>     |                            |                          |                            |                                |                            |                           |                                   |                              |                           |                         |                             |                            |                            |                          |                             |                          |                              |                                |                             |                              |                        |                          |                                  |                                   |                             |                             |                            |                             |                            |                          |                          |                              |                         |                          |                           |                           |                           |   |   |   |   |   |  |  |  |  |  |  |  |  |  |  |  |  |  |  |  |  |  |  |
| Participants       | 13a                        | N                        | N                          | N                              | N                          | N                         | N                                 | N                            | N                         | N                       | N                           | Y                          | N                          | N                        | N                           | Y                        | Y                            | N                              | N                           | Y                            | N                      | Y                        | Y                                | N                                 | N                           | N                           | N                          | N                           | N                          | Y                        | Y                        | N                            | Y                       | Y                        | N                         | Y                         | Y                         | N | N | Y | N |   |  |  |  |  |  |  |  |  |  |  |  |  |  |  |  |  |  |  |
|                    | 13b                        | N                        | N                          | N                              | N                          | N                         | N                                 | N                            | N                         | N                       | N                           | Y                          | N                          | N                        | N                           | N                        | N                            | N                              | N                           | N                            | N                      | Y                        | N                                | N                                 | N                           | *                           | N                          | N                           | N                          | Y                        | N                        | N                            | N                       | N                        | N                         | N                         | N                         | N | N | N | N | Y |  |  |  |  |  |  |  |  |  |  |  |  |  |  |  |  |  |  |
|                    | 13c                        | N                        | N                          | N                              | N                          | N                         | N                                 | Y                            | N                         | N                       | N                           | N                          | N                          | N                        | N                           | N                        | N                            | N                              | N                           | N                            | N                      | N                        | N                                | N                                 | N                           | N                           | N                          | N                           | N                          | Y                        | N                        | N                            | N                       | N                        | N                         | N                         | N                         | N | N | N | N |   |  |  |  |  |  |  |  |  |  |  |  |  |  |  |  |  |  |  |
| Descriptive data   | 14a                        | N                        | N                          | Y                              | N                          | N                         | Y                                 | Y                            | Y                         | Y                       | Y                           | Y                          | Y                          | Y                        | N                           | Y                        | Y                            | Y                              | Y                           | Y                            | Y                      | Y                        | Y                                | Y                                 | Y                           | Y                           | Y                          | Y                           | N                          | Y                        | Y                        | Y                            | N                       | Y                        | Y                         | N                         | Y                         | Y | Y | Y |   |   |  |  |  |  |  |  |  |  |  |  |  |  |  |  |  |  |  |  |
|                    | 14b                        | N                        | N                          | N                              | N                          | Y                         | N                                 | N                            | Y                         | N                       | Y                           | N                          | N                          | Y                        | N                           | N                        | Y                            | Y                              | N                           | Y                            | Y                      | N                        | Y                                | Y                                 | Y                           | Y                           | Y                          | Y                           | Y                          | N                        | Y                        | N                            | Y                       | N                        | N                         | N                         | Y                         | N | Y | Y |   |   |  |  |  |  |  |  |  |  |  |  |  |  |  |  |  |  |  |  |
| Outcome data       | 15                         | N                        | N                          | N                              | Y                          | N                         | N                                 | Y                            | Y                         | Y                       | Y                           | N                          | N                          | Y                        | Y                           | Y                        | Y                            | Y                              | N                           | N                            | Y                      | Y                        | Y                                | Y                                 | Y                           | Y                           | Y                          | Y                           | Y                          | Y                        | Y                        | Y                            | Y                       | Y                        | Y                         | N                         | Y                         | Y | Y | N |   |   |  |  |  |  |  |  |  |  |  |  |  |  |  |  |  |  |  |  |
| Main results       | 16a                        | N                        | N                          | N                              | N                          | N                         | Y                                 | N                            | N                         | Y                       | Y                           | N                          | N                          | N                        | N                           | N                        | Y                            | Y                              | N                           | N                            | Y                      | N                        | N                                | N                                 | Y                           | N                           | N                          | N                           | N                          | N                        | N                        | N                            | N                       | N                        | Y                         | N                         | N                         | N | N | N |   |   |  |  |  |  |  |  |  |  |  |  |  |  |  |  |  |  |  |  |
|                    | 16b                        | Y                        | Y                          | Y                              | Y                          | N                         | N                                 | N                            | Y                         | Y                       | N                           | Y                          | N                          | N                        | N                           | Y                        | Y                            | *                              | N                           | Y                            | Y                      | Y                        | Y                                | *                                 | *                           | *                           | *                          | *                           | *                          | *                        | Y                        | *                            | Y                       | N                        | N                         | Y                         | Y                         | Y | Y | Y |   |   |  |  |  |  |  |  |  |  |  |  |  |  |  |  |  |  |  |  |
| Other analyses     | 17                         | N                        | N                          | N                              | N                          | N                         | N                                 | Y                            | Y                         | Y                       | Y                           | Y                          | N                          | Y                        | Y                           | N                        | Y                            | N                              | N                           | Y                            | Y                      | N                        | Y                                | Y                                 | Y                           | Y                           | *                          | *                           | N                          | *                        | Y                        | Y                            | Y                       | Y                        | N                         | Y                         | Y                         | Y | Y | Y |   |   |  |  |  |  |  |  |  |  |  |  |  |  |  |  |  |  |  |  |
| <b>Discussion</b>  |                            |                          |                            |                                |                            |                           |                                   |                              |                           |                         |                             |                            |                            |                          |                             |                          |                              |                                |                             |                              |                        |                          |                                  |                                   |                             |                             |                            |                             |                            |                          |                          |                              |                         |                          |                           |                           |                           |   |   |   |   |   |  |  |  |  |  |  |  |  |  |  |  |  |  |  |  |  |  |  |
| Key results        | 18                         | N                        | N                          | Y                              | N                          | N                         | Y                                 | N                            | Y                         | N                       | N                           | Y                          | N                          | Y                        | Y                           | N                        | Y                            | Y                              | Y                           | N                            | N                      | Y                        | N                                | N                                 | N                           | Y                           | N                          | N                           | Y                          | Y                        | Y                        | Y                            | Y                       | Y                        | Y                         | Y                         | N                         | N | Y | Y | Y |   |  |  |  |  |  |  |  |  |  |  |  |  |  |  |  |  |  |  |
| Limitations        | 19                         | N                        | Y                          | Y                              | Y                          | N                         | N                                 | N                            | Y                         | Y                       | Y                           | N                          | Y                          | Y                        | Y                           | Y                        | Y                            | Y                              | N                           | Y                            | Y                      | Y                        | Y                                | Y                                 | Y                           | Y                           | Y                          | Y                           | Y                          | Y                        | Y                        | Y                            | Y                       | Y                        | Y                         | N                         | Y                         | Y | Y | Y | Y |   |  |  |  |  |  |  |  |  |  |  |  |  |  |  |  |  |  |  |
| Interpretation     | 20                         | N                        | N                          | Y                              | N                          | N                         | Y                                 | Y                            | Y                         | Y                       | Y                           | N                          | Y                          | Y                        | Y                           | Y                        | Y                            | Y                              | Y                           | Y                            | Y                      | Y                        | N                                | Y                                 | Y                           | N                           | Y                          | Y                           | Y                          | Y                        | Y                        | Y                            | Y                       | Y                        | Y                         | N                         | N                         | Y | Y | Y | Y |   |  |  |  |  |  |  |  |  |  |  |  |  |  |  |  |  |  |  |
| Generalisability   | 21                         | N                        | N                          | Y                              | N                          | N                         | N                                 | N                            | N                         | N                       | N                           | N                          | Y                          | N                        | N                           | N                        | N                            | N                              | N                           | N                            | N                      | Y                        | Y                                | Y                                 | N                           | N                           | Y                          | N                           | Y                          | Y                        | Y                        | Y                            | Y                       | Y                        | Y                         | N                         | Y                         | Y | Y | Y | Y |   |  |  |  |  |  |  |  |  |  |  |  |  |  |  |  |  |  |  |
| <b>Other</b>       |                            |                          |                            |                                |                            |                           |                                   |                              |                           |                         |                             |                            |                            |                          |                             |                          |                              |                                |                             |                              |                        |                          |                                  |                                   |                             |                             |                            |                             |                            |                          |                          |                              |                         |                          |                           |                           |                           |   |   |   |   |   |  |  |  |  |  |  |  |  |  |  |  |  |  |  |  |  |  |  |
| Funding            | 22                         | Y                        | N                          | N                              | Y                          | N                         | N                                 | N                            | Y                         | Y                       | N                           | Y                          | Y                          | Y                        | Y                           | Y                        | Y                            | Y                              | Y                           | Y                            | Y                      | N                        | Y                                | N                                 | N                           | Y                           | N                          | Y                           | Y                          | Y                        | Y                        | Y                            | Y                       | N                        | N                         | Y                         | N                         | N | Y | Y |   |   |  |  |  |  |  |  |  |  |  |  |  |  |  |  |  |  |  |  |
| <b>COR Score</b>   |                            | <b>4</b>                 | <b>4</b>                   | <b>10</b>                      | <b>9</b>                   | <b>3</b>                  | <b>8</b>                          | <b>13</b>                    | <b>14</b>                 | <b>15</b>               | <b>10</b>                   | <b>13</b>                  | <b>10</b>                  | <b>12</b>                | <b>14</b>                   | <b>12</b>                | <b>23</b>                    | <b>17</b>                      | <b>7</b>                    | <b>11</b>                    | <b>17</b>              | <b>18</b>                | <b>13</b>                        | <b>12</b>                         | <b>13</b>                   | <b>17</b>                   | <b>8</b>                   | <b>8</b>                    | <b>13</b>                  | <b>17</b>                | <b>24</b>                | <b>13</b>                    | <b>11</b>               | <b>8</b>                 | <b>15</b>                 | <b>16</b>                 | <b>15</b>                 |   |   |   |   |   |  |  |  |  |  |  |  |  |  |  |  |  |  |  |  |  |  |  |
| <b>COR Average</b> | 12±4.6 (3-24) <sup>†</sup> |                          |                            |                                |                            |                           |                                   |                              |                           |                         |                             |                            |                            |                          |                             |                          |                              |                                |                             |                              |                        |                          |                                  |                                   |                             |                             |                            |                             |                            |                          |                          |                              |                         |                          |                           |                           |                           |   |   |   |   |   |  |  |  |  |  |  |  |  |  |  |  |  |  |  |  |  |  |  |

‘COR’= Completeness of Reporting; ‘N’= No; ‘Y’= Yes; ‘\*’= Not applicable; †mean±standard deviation (range)
